# Supplementary material for: Identifying fit-for purpose methods for monitoring fish communities
Source: Frontiers journal article supplement (doi:10.3389/fmars.2023.1322367), 2024-01-12
Supplement: Table_1.DOCX [file Table_1.DOCX]

**Supplementary material**

Table 1 : Combination of Keywords Used for Literature Search. One term from Level 1 and Level 2 keywords was consistently included and used in various combinations. All combinations were then paired with optional keywords.

| **Keyword Level 1** | **Keyword Level 2** | **Optional keywords** |
| --- | --- | --- |
| Monitoring/Sampling | Fish/fish assemblages/ fish communities |  |
| Marine Protected Areas |
| Passive fishing |
| Underwater video |
| Acoustic methods/hydroacoustics |
| eDNA |

**Supplementary References – all publications skimmed but not included in the Manuscript**

Adams, P. B., Butler, J. L., Baxter, C. H., Laidig, T. E., Dahlin, K. A., & Wakefield, W. (1995). Population estimates of Pacific coast groundfishes from video transects and swept-area trawls. Fishery Bulletin, 93, 446–455.

Aguzzi, J., Chatzievangelou, D., Company, J. B., Thomsen, L., Marini, S., Bonofiglio, F., … & Gaughan, P. (2020). The potential of video imagery from worldwide cabled observatory networks to provide information supporting fish-stock and biodiversity assessment. ICES Journal of Marine Science, 77(7–8), 2396–2410. doi: 10.1093/icesjms/fsaa169

Bacheler, N., Gillum, Z., Gregalis, K., Pickett, E., Schobernd, C., Schobernd, Z., … & Bubley, W. (2022). Comparison of video and traps for detecting reef fishes and quantifying species richness in the continental shelf waters of the southeast USA. Marine Ecology Progress Series, 698, 111–123. doi: 10.3354/meps14141

Bacheler, N. M., & Shertzer, K. W. (2014). Estimating relative abundance and species richness from video surveys of reef fishes. Fishery Bulletin, 113(1), 15–26. doi: 10.7755/FB.113.1.2

Bayley, D. T. I., Mogg, A. O. M., Purvis, A., & Koldewey, H. J. (2019). Evaluating the efficacy of small-scale marine protected areas for preserving reef health: A case study applying emerging monitoring technology. Aquatic Conservation: Marine and Freshwater Ecosystems, 29(12), 2026–2044. doi: 10.1002/aqc.3215

Bianchi, C. N., Azzola, A., Cocito, S., Morri, C., Oprandi, A., Peirano, A., Sgorbini, S., & Montefalcone, M. (2022). Biodiversity Monitoring in Mediterranean Marine Protected Areas: Scientific and Methodological Challenges. Diversity, 14(1), 43. doi: 10.3390/d14010043

Boenish, R., Willard, D., Kritzer, J. P., & Reardon, K. (2020). Fisheries monitoring: Perspectives from the United States. Aquaculture and Fisheries, 5(3), 131–138. doi: 10.1016/j.aaf.2019.10.002

Caldwell, Z. R., Zgliczynski, B. J., Williams, G. J., & Sandin, S. A. (2016). Reef Fish Survey Techniques: Assessing the Potential for Standardizing Methodologies. PLOS ONE, 11(4), e0153066. doi: 10.1371/journal.pone.0153066

Campbell, M. D., Pollack, A. G., Gledhill, C. T., Switzer, T. S., & DeVries, D. A. (2015). Comparison of relative abundance indices calculated from two methods of generating video count data. Fisheries Research, 170, 125–133. doi: 10.1016/j.fishres.2015.05.011

Campbell, N., Dobby, H., & Bailey, N. (2009). Investigating and mitigating uncertainties in the assessment of Scottish *Nephrops norvegicus* populations using simulated underwater television data. ICES Journal of Marine Science, 66(4), 646–655. doi: 10.1093/icesjms/fsp046

Cappo, M., De’ath, G., & Speare, P. (2007). Inter-reef vertebrate communities of the Great Barrier Reef Marine Park determined by baited remote underwater video stations. Marine Ecology Progress Series, 350, 209–221. doi: 10.3354/meps07189

Cappo, M., Harvey, E., Malcolm, H., & Speare, P. (2003). Potential of video techniques to monitor diversity, abundance and size of fish in studies of marine protected areas. Aquatic Protected Areas - What Works Best and How Do We Know, 1, 455–464.

Cappo, M., Speare, P., & De’ath, G. (2004). Comparison of baited remote underwater video stations (BRUVS) and prawn (shrimp) trawls for assessments of fish biodiversity in inter-reefal areas of the Great Barrier Reef Marine Park. Journal of Experimental Marine Biology and Ecology, 302(2), 123–152. doi: 10.1016/j.jembe.2003.10.006

Carbines, G., & Cole, R. G. (2009). Using a remote drift underwater video (DUV) to examine dredge impacts on demersal ﬁshes and benthic habitat complexity in Foveaux Strait, Southern New Zealand. Fisheries Research, 96, 230–237.

Clavero, M., Blanco-Garrido, F., & Prenda, J. (2006). Monitoring small fish populations in streams: A comparison of four passive methods. Fisheries Research, 78(2–3), 243–251. doi: 10.1016/j.fishres.2005.11.016

Cowx, I. g., Harvey, J. p., Noble, R. a., & Nunn, A. d. (2009). Establishing survey and monitoring protocols for the assessment of conservation status of fish populations in river Special Areas of Conservation in the UK. Aquatic Conservation: Marine and Freshwater Ecosystems, 19(1), 96–103. doi: 10.1002/aqc.968

Cresswell, A. K., Ryan, N. M., Heyward, A. J., Smith, A. N. H., Colquhoun, J., Case, M., … & Gilmour, J. P. (2021). A quantitative comparison of towed-camera and diver-camera transects for monitoring coral reefs. PeerJ, 9, e11090. doi: 10.7717/peerj.11090

Devine, B. M., Wheeland, L. J., de Moura Neves, B., & Fisher, J. A. D. (2019). Baited remote underwater video estimates of benthic fish and invertebrate diversity within the eastern Canadian Arctic. Polar Biology, 42(7), 1323–1341. doi: 10.1007/s00300-019-02520-5

Dorn, N. J., Urgelles, R., & Trexler, J. C. (2005). Evaluating active and passive sampling methods to quantify crayfish density in a freshwater wetland. Journal of the North American Benthological Society, 24(2), 346–356. doi: 10.1899/04-037.1

Dunham, A., Dunham, J. S., Rubidge, E., Iacarella, J. C., & Metaxas, A. (2020). Contextualizing ecological performance: Rethinking monitoring in marine protected areas. Aquatic Conservation: Marine and Freshwater Ecosystems, 30(10), 2004–2011. doi: 10.1002/aqc.3381

Edgar, G. J., & Barrett, N. S. (1997). Short term monitoring of biotic change in Tasmanian marine reserves. Journal of Experimental Marine Biology and Ecology, 213(2), 261–279. doi: 10.1016/S0022-0981(96)02769-4

Eichmiller, J. J., Miller, L. M., & Sorensen, P. W. (2016). Optimizing techniques to capture and extract environmental DNA for detection and quantification of fish. Molecular Ecology Resources, 16(1), 56–68. doi: 10.1111/1755-0998.12421

Elliott, S. a. M., Ahti, P. A., Heath, M. R., Turrell, W. R., & Bailey, D. M. (2016). An assessment of juvenile Atlantic cod Gadus morhua distribution and growth using diver operated stereo-video surveys. Journal of Fish Biology, 89(2), 1190–1207. doi: 10.1111/jfb.12998

Farnsworth, K. D., Thygesen, U. H., Ditlevsen, S., & King, N. J. (2007). How to estimate scavenger fish abundance using baited camera data. Marine Ecology Progress Series, 350, 223-234. doi: 10.3354/meps07190

Fox, C. (2017) To Develop the Methodology to Undertake Stock Assessments on Razor Fish Using Combinations of Video Monitoring and Electrofishing Gear. Scottish Marine and Freshwater Science, 8 (6), 92pp. doi: 10.7489/1908-1

Fraschetti, S., Terlizzi, A., Micheli, F., Benedetti-Cecchi, L., & Boero, F. (2002). Marine Protected Areas in the Mediterranean Sea: Objectives, Effectiveness and Monitoring. Marine Ecology, 23(s1), 190–200. doi: 10.1111/j.1439-0485.2002.tb00018.x

Gabriel, O., Lange, K., Dahm, E., Wendt, T. (2005). Fish Catching Methods of the World. John Wiley & Sons, Ltd. doi: 10.1002/9780470995648

Gaeta, J. C., Júnior, E. F., Aguiar, M. M., & Freire, A. S. (2011). The use of a non-destructive method to estimate the abundance of brachyuran crabs (Crustacea, Decapoda) in coastal islands of a marine protected area. Pan-American Journal of Aquatic Sciences, 6(4), 264–272.

Galaiduk, R., Radford, B. T., Wilson, S. K., & Harvey, E. S. (2017). Comparing two remote video survey methods for spatial predictions of the distribution and environmental niche suitability of demersal fishes. Scientific Reports, 7(1), 17633. doi: 10.1038/s41598-017-17946-2

Gledhill, C. T., Ingram, G. W., Rademacher, K. R., Felts, P., & Trigg, B. (2006). NOAA Fisheries Reef Fish Video Surveys: Yearly indices of abundance for gag (Mycteroperca microlepsis). SEDAR10-DW-12. Southeast Data Assessment and Review, North Charleston, South Carolina, 28.

Hansson, S., & Rudstam, L. G. (1995). Gillnet catches as an estimate of fish abundance: A comparison between vertical gillnet catches and hydroacoustic abundances of Baltic Sea herring (*Clupea harengus*) and sprat (*Sprattus sprattus*). Canadian Journal of Fisheries and Aquatic Sciences, 52(1), 75–83. doi: 10.1139/f95-007

Harvey, E., Cappo, M., Butler, J., Hall, N., & Kendrick, G. (2007). Bait attraction affects the performance of remote underwater video stations in assessment of demersal fish community structure. Marine Ecology Progress Series, 350, 245–254. doi: 10.3354/meps07192

Harvey, E., Fletcher, D., & Shortis, M. (2002). Estimation of reef ﬁsh length by divers and by stereo-video A ﬁrst comparison of the accuracy and precision in the ﬁeld on living ﬁsh under operational conditions. Fisheries Research, 57, 255–265. doi: 10.1016/S0165-7836(01)00356-3

Harvey, E. S., McLean, D. L., Goetze, J. S., Saunders, B. J., Langlois, T. J., Monk, … Newman, S. J. (2021). The BRUVs workshop – An Australia-wide synthesis of baited remote underwater video data to answer broad-scale ecological questions about fish, sharks and rays. Marine Policy, 127, 104430. doi: 10.1016/j.marpol.2021.104430

Harvey, E. S., & Shortis, M. R. (1995). A System for Stereo-Video Measurement of Sub-Tidal Organisms. Marine Technology Society Journal, 29(4), 10–22.

Holmes, T. H., Wilson, S. K., Travers, M. J., Langlois, T. J., Evans, R. D., Moore, G. I., Douglas, R. A., Shedrawi, G., Harvey, E. S., & Hickey, K. (2013). A comparison of visual- and stereo-video based fish community assessment methods in tropical and temperate marine waters of Western Australia. Limnology and Oceanography: Methods, 11(7), 337–350. doi: 10.4319/lom.2013.11.337

Huse, I. (2000). Relative selectivity in trawl, longline and gillnet fisheries for cod and haddock. ICES Journal of Marine Science, 57(4), 1271–1282. doi.org/10.1006/jmsc.2000.0813

Hussey, N. E., Kessel, S. T., Aarestrup, K., Cooke, S. J., Cowley, P. D., Fisk, A. T., Harcourt, R. G., … & Whoriskey, F. G. (2015). Aquatic animal telemetry: A panoramic window into the underwater world. Science, 348(6240), 1255642–1255642. doi: 10.1126/science.1255642

Jac, C., Desroy, N., Duchêne, J.-C., Foveau, A., Labrune, C., Lescure, L., & Vaz, S. (2021). Assessing the impact of trawling on benthic megafauna: Comparative study of video surveys vs. scientific trawling. ICES Journal of Marine Science, 78(5), 1636–1649. doi: 10.1093/icesjms/fsab033

Jackson, D. A., & Harvey, H. H. (1997). Qualitative and quantitative sampling of lake fish communities. Canadian Journal of Fisheries and Aquatic Sciences, 54(12), 2807–2813. doi: 10.1139/f97-182

Johnston, S. V., Rivera, J. A., Rosario, A., Timko, M. A., Nealson, P. A., & Kumagai, K. K. (2006). Hydroacoustic evaluation of spawning red hind (*Epinephelus guttatus)* aggregations along the coast of Puerto Rico in 2002 and 2003. Emerging Technologies for Reef Fisheries Research and Management. NOAA Professional Paper NMFS, 5, 10–17.

Jurvelius, J., Kolari, I., & Leskelä, A. (2011). Quality and status of fish stocks in lakes: Gillnetting, seining, trawling and hydroacoustics as sampling methods. Hydrobiologia, 660(1), 29–36. doi: 10.1007/s10750-010-0385-6

Katsanevakis, S., Weber, A., Pipitone, C., Leopold, M., Cronin, M., Scheidat, M., … & Vöge, S. (2012). Monitoring marine populations and communities: Methods dealing with imperfect detectability. Aquatic Biology, 16(1), 31–52. doi: 10.3354/ab00426

Kessel, S. T., Cooke, S. J., Heupel, M. R., Hussey, N. E., Simpfendorfer, C. A., Vagle, S., & Fisk, A. T. (2014). A review of detection range testing in aquatic passive acoustic telemetry studies. Reviews in Fish Biology and Fisheries, 24(1), 199–218. doi: 10.1007/s11160-013-9328-4

Krueger, K. L., Hubert, W. A., & Price, R. M. (1998). Tandem-Set Fyke Nets for Sampling Benthic Fishes in Lakes. North American Journal of Fisheries Management, 18(1), 154–160. doi: 10.1577/1548-8675(1998)018<0154:TSFNFS>2.0.CO;2

Langlois, T., Williams, J., Monk, J., Bouchet, P., Currey, L., Goetze, J., … & Whitmore, S. (2018). Marine sampling field manual for benthic stereo BRUVS (Baited Remote Underwater Videos). In Field Manuals for Marine Sampling to Monitor Australian Waters, Przeslawski R, Foster S (Eds.). National Environmental Science Programme (NESP). 82–104.

Lembke, C., Grasty, S., Silverman, A., Broadbent, H., Butcher, S., & Murawski, S. (2017). The Camera-Based Assessment Survey System (C-BASS): A towed camera platform for reef fish abundance surveys and benthic habitat characterization in the Gulf of Mexico. Continental Shelf Research, 151, 62–71. doi: 10.1016/j.csr.2017.10.010

Letessier, T. B., Kawaguchi, S., King, R., Meeuwig, J. J., Harcourt, R., & Cox, M. J. (2013). A Robust and Economical Underwater Stereo Video System to Observe Antarctic Krill (*Euphausia superba*). Open Journal of Marine Science, 03(03), 148–153. doi: 10.4236/ojms.2013.33016

Luczkovich, J. J., Mann, D. A., & Rountree, R. A. (2008). Passive Acoustics as a Tool in Fisheries Science. Transactions of the American Fisheries Society, 137(2), 533–541. doi: 10.1577/T06-258.1

Lugg, W. H., Griffiths, J., van Rooyen, A. R., Weeks, A. R., & Tingley, R. (2018). Optimal survey designs for environmental DNA sampling. Methods in Ecology and Evolution, 9(4), 1049–1059. doi: 10.1111/2041-210X.12951

Marshell, A., Mills, J. S., Rhodes, K. L., & McIlwain, J. (2011). Passive acoustic telemetry reveals highly variable home range and movement patterns among unicornfish within a marine reserve. Coral Reefs, 30(3), 631–642. doi: 10.1007/s00338-011-0770-2

Minamoto, T., Yamanaka, H., Takahara, T., Honjo, M. N., & Kawabata, Z. (2012). Surveillance of fish species composition using environmental DNA. Limnology, 13(2), 193–197. doi: 10.1007/s10201-011-0362-4

Misund, O. A. (1997). Underwater acoustics in marine fisheries and fisheries research. Reviews in Fish Biology and Fisheries, 7, 1–34.

Morrison, M., & Carbines, G. (2006). Estimating the abundance and size structure of an estuarine population of the sparid *Pagrus auratus*, using a towed camera during nocturnal periods of inactivity, and comparisons with conventional sampling techniques. Fisheries Research, 82(1–3), 150–161. doi: 10.1016/j.fishres.2006.06.024

Olin, M., & Malinen, T. (2003). Comparison of gillnet and trawl in diurnal fish community sampling. Hydrobiologia, 506–509(1–3), 443–449. doi: 10.1023/B:HYDR.0000008545.33035.c4

Pauly, D. (1980). A selection of simple methods for the assessment of tropical fish stocks. FAO Fisheries Circular, 729, 54 p.

Pelletier, D., Leleu, K., Mou-Tham, G., Guillemot, N., & Chabanet, P. (2011). Comparison of visual census and high definition video transects for monitoring coral reef fish assemblages. Fisheries Research, 107, 84–93. doi: 10.1016/j.fishres.2010.10.011

Perkins, N. R., Prall, M., Chakraborty, A., White, J. W., Baskett, M. L., & Morgan, S. G. (2021). Quantifying the statistical power of monitoring programs for marine protected areas. Ecological Applications, 31(1), e2215. doi:10.1002/eap.2215

Perry, D., Staveley, T. A. B., Hammar, L., Meyers, A., Lindborg, R., & Gullström, M. (2018). Temperate fish community variation over seasons in relation to large-scale geographic seascape variables. Canadian Journal of Fisheries and Aquatic Sciences, 75(10), 1723–1732. doi: 10.1139/cjfas-2017-0032

Pope, K. L., Lochmann, S. E., & Young, M. K. (2010). Methods for assessing fish populations. In Hubert, Wayne A; Quist, Michael C., eds. Inland Fisheries Management in North America, 3rd edition. Bethesda, MD: American Fisheries Society, 325–351.

Pratt, T. C., Smokorowski, K. E., & Muirhead, J. R. (2005). Development and experimental assessment of an underwater video technique for assessing fish-habitat relationships. Archiv Für Hydrobiologie, 164(4), 547–571. doi: 10.1127/0003-9136/2005/0164-0547

Rand, P. S., Taylor, J. C., & Eggleston, D. B. (2006). A video method for quantifying size distribution, density, and three-dimensional spatial structure of reef fish spawning aggregations. Emerging technologies for reef fisheries research and management, 4–9.

Robichaud, D., Hunte, W., & Chapman, M. R. (2000). Factors affecting the catchability of reef fishes in antillean fish traps. Bulletin of Marine Science, 67(2), 15.

Rotherham, D., Gray, C. A., Broadhurst, M. K., Johnson, D. D., Barnes, L. M., & Jones, M. V. (2006). Sampling estuarine fish using multi-mesh gill nets: Effects of panel length and soak and setting times. Journal of Experimental Marine Biology and Ecology, 331(2), 226–239. doi: 10.1016/j.jembe.2005.10.010

Rourke, M. L., Fowler, A. M., Hughes, J. M., Broadhurst, M. K., DiBattista, J. D., Fielder, S., Wilkes Walburn, J., & Furlan, E. M. (2021). Environmental DNA (eDNA) as a tool for assessing fish biomass: A review of approaches and future considerations for resource surveys. Environmental DNA, 4(1), 9–33. doi: 10.1002/edn3.185

Rudstam, L. G., Magnuson, J. J., & Tonn, W. M. (1984). Size Selectivity of Passive Fishing Gear: A Correction for Encounter Probability Applied to Gill Nets. Canadian Journal of Fisheries and Aquatic Sciences, 41(8), 1252–1255. doi: 10.1139/f84-151

Ruff, B. P., Marchant, J. A., & Frost, A. R. (1995). Fish sizing and monitoring using a stereo image analysis system applied to fish farming. Aquacultural Engineering, 14(2), 155–173. doi: 10.1016/0144-8609(94)P4433-C

Samoilys, M., & Gribble, N. (1997). Manual for assessing fish stocks on Pacific coral reefs. 89.

Sanchez, P. (2000). The impact of otter trawling on mud communities in the northwestern Mediterranean. ICES Journal of Marine Science, 57(5), 1352–1358. doi: 10.1006/jmsc.2000.0928

Schmid, K., Reis-Filho, J. A., Harvey, E., & Giarrizzo, T. (2017). Baited remote underwater video as a promising nondestructive tool to assess fish assemblages in clearwater Amazonian rivers: Testing the effect of bait and habitat type. Hydrobiologia, 784(1), 93–109. doi: 10.1007/s10750-016-2860-1

Schramm, K. D., Harvey, E. S., Goetze, J. S., Travers, M. J., Warnock, B., & Saunders, B. J. (2020). A comparison of stereo-BRUV, diver operated and remote stereo-video transects for assessing reef fish assemblages. Journal of Experimental Marine Biology and Ecology, 524, 151273. doi: 10.1016/j.jembe.2019.151273

Shah Esmaeili, Y., Corte, G., Checon, H., Gomes, T., Lefcheck, J., Amaral, A., & Turra, A. (2021). Comprehensive assessment of shallow surf zone fish biodiversity requires a combination of sampling methods. Marine Ecology Progress Series, 667, 131–144. doi: 10.3354/meps13711

Sheehan, E. V., Bridger, D., Nancollas, S. J., & Pittman, S. J. (2020). PelagiCam: A novel underwater imaging system with computer vision for semi-automated monitoring of mobile marine fauna at offshore structures. Environmental Monitoring and Assessment, 192(1), 1–13. doi: 10.1007/s10661-019-7980-4

Stat, M., Huggett, M. J., Bernasconi, R., DiBattista, J. D., Berry, T. E., Newman, S. J., Harvey, E. S., & Bunce, M. (2017). Ecosystem biomonitoring with eDNA: Metabarcoding across the tree of life in a tropical marine environment. Scientific Reports, 7(1), 12240. doi: 10.1038/s41598-017-12501-5

Stobart, B., García-Charton, J. A., Espejo, C., Rochel, E., Goñi, R., Reñones, O., … & Pérez-Ruzafa, A. (2007). A baited underwater video technique to assess shallow-water Mediterranean fish assemblages: Methodological evaluation. Journal of Experimental Marine Biology and Ecology, 345(2), 158–174. doi: 10.1016/j.jembe.2007.02.009

Stokesbury, K. D. E., Cadrin, S. X., Calabrese, N., Keiley, E., Lowery, T. M., Rothschild, B. J., & DeCelles, G. R. (2017). Towards an Improved System for Sampling New England Groundfish Using Video Technology. Fisheries, 42(8), 432–439. doi: 10.1080/03632415.2017.1342630

Stoner, A. W., Spencer, M. L., & Ryer, C. H. (2007). Flatfish-habitat associations in Alaska nursery grounds: Use of continuous video records for multi-scale spatial analysis. Journal of Sea Research, 57(2–3), 137–150. doi: 10.1016/j.seares.2006.08.005

Sward, D., Monk, J., & Barrett, N. (2019). A Systematic Review of Remotely Operated Vehicle Surveys for Visually Assessing Fish Assemblages. Frontiers in Marine Science, 6, 134. doi: 10.3389/fmars.2019.00134

Trenkel, V. M., Charrier, G., Lorance, P., & Bravington, M. V. (2022). Close-kin mark–recapture abundance estimation: Practical insights and lessons learned. ICES Journal of Marine Science, 79(2), 413–422. doi: 10.1093/icesjms/fsac002

Trenkel, V. M., Lorance, P., & Mahévas, S. (2004). Do visual transects provide true population density estimates for deepwater fish? ICES Journal of Marine Science, 61(7), 1050–1056. doi: 10.1016/j.icesjms.2004.06.002

Trobbiani, G. A., & Irigoyen, A. J. (2016). „Pepe“: A novel low cost drifting video system for underwater survey. 2016 3rd IEEE/OES South American International Symposium on Oceanic Engineering (SAISOE), 1–4. doi: 10.1109/SAISOE.2016.7922472

Turner, C. R., Uy, K. L., & Everhart, R. C. (2015). Fish environmental DNA is more concentrated in aquatic sediments than surface water. Biological Conservation, 183, 93–102. doi: 10.1016/j.biocon.2014.11.017

Unsworth, R. K. F., Peters, J. R., McCloskey, R. M., & Hinder, S. L. (2014). Optimising stereo baited underwater video for sampling fish and invertebrates in temperate coastal habitats. Estuarine, Coastal and Shelf Science, 150, 281–287. doi: 10.1016/j.ecss.2014.03.020

Uzmann, J. R., Cooper, R. A., Theroux, R. B., & Wigley, R. L. (1977). Synoptic Comparison of Three Sampling Techniques for Estimating Abundance and Distribution of Selected Megafauna: Submersible vs Camera Sled vs Otter Trawl. Marine Fisheries Review, 39(12), 11–19.

Wagner, T., Vandergoot, C. S., & Tyson, J. (2009). Evaluating the Power to Detect Temporal Trends in Fishery-Independent Surveys: A Case Study Based on Gill Nets Set in the Ohio Waters of Lake Erie for Walleyes. North American Journal of Fisheries Management, 29(3), 805–816. doi: 10.1577/M08-197.1

Watson, J. L., & Huntington, B. E. (2016). Assessing the performance of a cost-effective video lander for estimating relative abundance and diversity of nearshore fish assemblages. Journal of Experimental Marine Biology and Ecology, 483, 104–111. doi: 10.1016/j.jembe.2016.07.007

Weltz, K., Lyle, J. M., Ovenden, J., Morgan, J. A. T., Moreno, D. A., & Semmens, J. M. (2017). Application of environmental DNA to detect an endangered marine skate species in the wild. PLOS ONE, 12(6), e0178124. doi: 10.1371/journal.pone.0178124

Whitmarsh, S. K., Huveneers, C., & Fairweather, P. G. (2018). What are we missing? Advantages of more than one viewpoint to estimate fish assemblages using baited video. Royal Society Open Science, 5(5), 1711993. doi: 10.1098/rsos.171993

Wilkins, J., Norton, J., & Roegner, G. (2019). Monitoring a nearshore beneficial use site: Application of a benthic sled and video annotation. Engineer Research and Development Center (U.S.). doi: 10.21079/11681/31593

Zhou, S., Fan, C., Xia, H., Zhang, J., Yang, W., Ji, D., … & Liu, N. (2022). Combined Use of eDNA Metabarcoding and Bottom Trawling for the Assessment of Fish Biodiversity in the Zhoushan Sea. Frontiers in Marine Science, 8, 809703. doi: 10.3389/fmars.2021.809703
